# Supplementary material for: Detection of Novel Biallelic Causative Variants in COL7A1 Gene by Whole-Exome Sequencing, Resulting in Congenital Recessive Dystrophic Epidermolysis Bullosa in Three Unrelated Families
Source: MDPI journal article supplement (doi:10.3390/diagnostics12071525), 2022-06-23
Supplement: s1 [file s1]

Table S1. Primers used for the amplification of the regions of interest.

| Gene name | EXON/<br>INTRON<br>number | primer sequence (5'-3')                   | Tm(c) | product<br>size | Length | No of<br>hits |
|-----------|---------------------------|-------------------------------------------|-------|-----------------|--------|---------------|
| COL7A1    | 91                        | LEFT PRIMER 5'- CTGTCTCTCCAGTGGCCTA -3'   | 56.40 | 583bp           | 19     | 1             |
|           |                           | RIGHT PRIMER 5'- CCCAGATGTGGTGAGAAAC -3'  | 56.32 |                 | 19     | 2             |
| COL7A1    | 3                         | LEFT PRIMER 5'- CCTGATACCCGTAACCCTCA -3'  | 59.81 | 457bp           | 20     | 1             |
|           |                           | RIGHT PRIMER 5'-CACTCCTGCTCGGTCCTTAC-3'   | 59.87 |                 | 20     | 1             |
| COL7A1    | 12                        | LEFT PRIMER 5'- GCTGGTCTGACCCTGTTATC -3'  | 57.16 | 562bp           | 20     | 2             |
|           |                           | RIGHT PRIMER 5'- AGACACACCCTGTTGACAGTT-3' | 57.10 |                 | 21     | 1             |
